# Supplementary material for: Prediction of gene regulatory enhancers across species reveals evolutionarily conserved sequence properties
Source: PubMed Central journal article supplement (PMC6191148; doi:10.1371/journal.pcbi.1006484), 2018-10-04

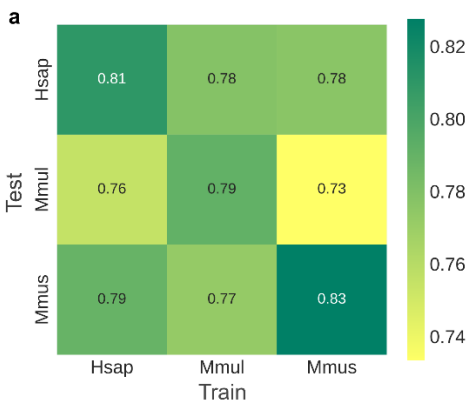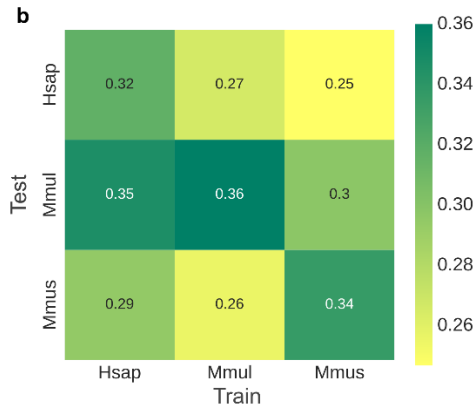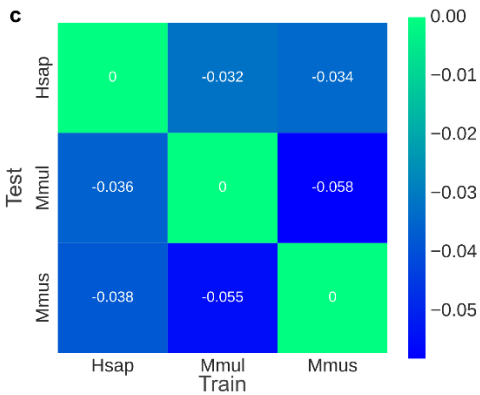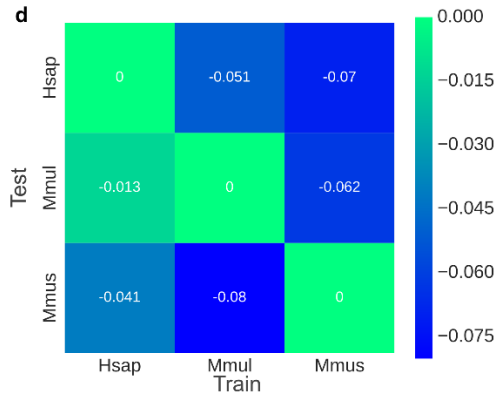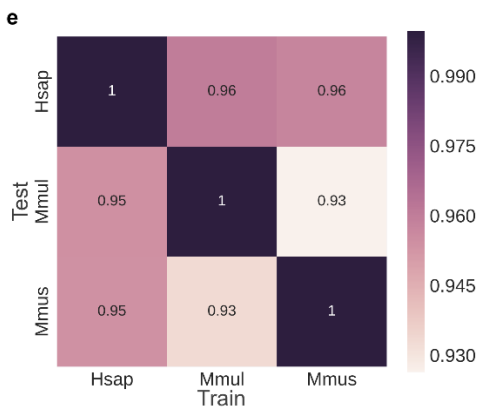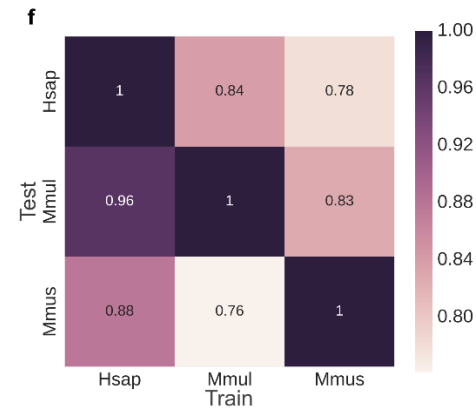

Supplement: pcbi.1006484.s011.pdf [file pcbi.1006484.s011.pdf]
