# Supplementary material for: Prediction of gene regulatory enhancers across species reveals evolutionarily conserved sequence properties
Source: PubMed Central journal article supplement (PMC6191148; doi:10.1371/journal.pcbi.1006484), 2018-10-04
Supplement: pcbi.1006484.s025.pdf [file pcbi.1006484.s025.pdf]

conv 1  
(filter size: 4x16, stride: 1, neurons: 256)

maxpooling 1  
(pooling size: 4, stride: 4)

conv 2  
(filter size: 1x8, stride: 1, neurons: 128)

maxpooling 2  
(pooling size :4, stride: 4)

conv 3  
(filter size: 1x16, stride: 1, neurons: 128)

dense  
(neurons: 32)

sigmoid output  
(neurons: 1)
